# Supplementary material for: Flux growth and characterization of an FeSi4P4 single crystal
Source: Royal Society of Chemistry journal article supplement (doi:10.1039/c7ra08118a), 2017-01-01
Supplement: c7ra08118a1.pdf [file c7ra08118a1.pdf]

# Electronic Supplementary Information (ESI) available:

## Flux Growth and Characterization of FeSi<sub>4</sub>P<sub>4</sub> Single Crystal

Tongtong Yu,<sup>a</sup> Shanpeng Wang,<sup>\*ab</sup> Huapeng Ruan,<sup>a</sup> Chunlong Li,<sup>a</sup> Xixia Zhang,<sup>a</sup> Ning Jia,<sup>a</sup> Jian Zhang,<sup>ab</sup> and Xutang Tao<sup>\*ab</sup>

- a. State Key Laboratory of Crystal Materials, Institute of Crystal Materials, Shandong University, No. 27 Shanda South Road, Jinan, 250100, PR China.
- b. State Key Laboratory of Functional Crystal Materials and Device, (Shandong University, Ministry of Education), No. 27 Shanda South Road, Jinan, PR China. E-mail: [wshp@sdu.edu.cn](mailto:wshp@sdu.edu.cn), [txt@sdu.edu.cn](mailto:txt@sdu.edu.cn).

**Fig. S1** The EDS spectrum of the FSP crystal. No Sn element is detected in the spectrum.

**Fig. S2** DSC and TGA data for FSP single crystal. The FSP crystal decomposes at about 1157.1 °C.

**Fig. S3** The survey XPS spectrum of the FeSi<sub>4</sub>P<sub>4</sub> crystal without being soaked in dilute hydrochloric acid. The Binding Energy of Sn 3d peaks are between 480 eV and 500 eV.

**Fig. S4** The M-T curve of the FeSi<sub>4</sub>P<sub>4</sub> crystal without being soaked in dilute hydrochloric acid. The value of the magnetization descends to 0 at about 70 K.

**Fig. S5** The curve of temperature dependent inverse susceptibility (red point) and the Curie-Weiss fitting (black line).

**Table S1** Fractional atomic coordinates and isotropic or equivalent isotropic displacement parameters (Å<sup>2</sup>).

**Table S2** Atomic displacement parameters (Å<sup>2</sup>).

**Table S3** The bond lengths of FeSi<sub>4</sub>P<sub>4</sub> crystal.

**Table S4** The bond angles of FeSi<sub>4</sub>P<sub>4</sub> crystal.

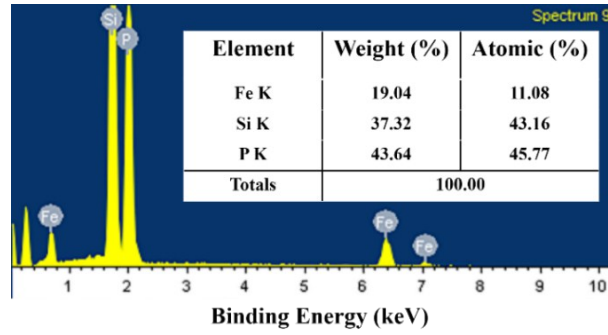

**Fig. S1** The EDS spectrum of the FSP crystal. No Sn element is detected in the spectrum.

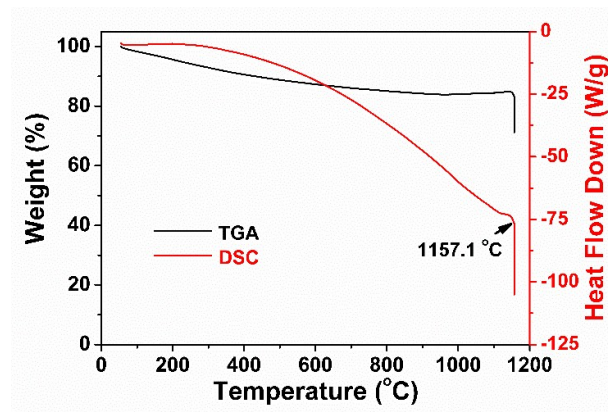

**Fig. S2** DSC and TGA data for FSP single crystal. The FSP crystal decomposes at about 1157.1 °C.

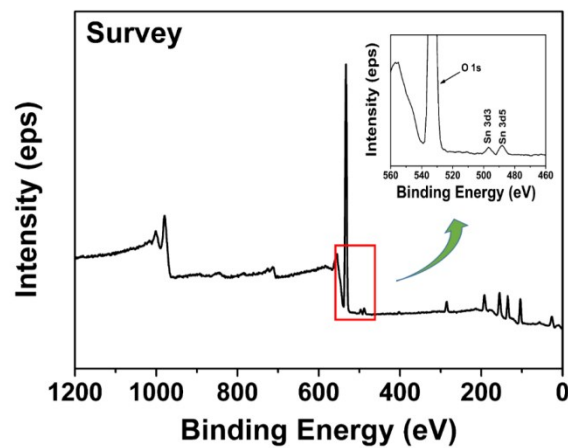

**Fig. S3** The survey XPS spectrum of the  $\text{FeSi}_4\text{P}_4$  crystal without being soaked in dilute hydrochloric acid. The Binding Energy of Sn 3d peaks are between 480 eV and 500 eV.

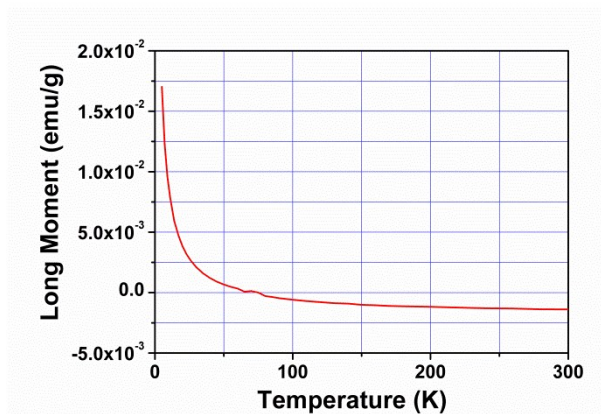

**Fig. S4** The M-T curve of the  $\text{FeSi}_4\text{P}_4$  crystal without being soaked in dilute hydrochloric acid. The value of the magnetization descends to 0 at about 70 K.

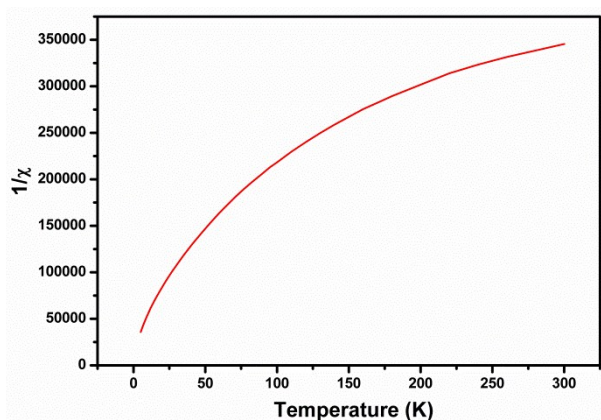

**Fig. S5** The curve of temperature dependent inverse susceptibility.

**Table S1** Fractional atomic coordinates and isotropic or equivalent isotropic displacement parameters ( $\text{\AA}^2$ ).

|            | <i>x</i>    | <i>y</i>   | <i>z</i>    | $U_{\text{iso}}^*/U_{\text{eq}}$ |
|------------|-------------|------------|-------------|----------------------------------|
| <b>Fe1</b> | 0.3202 (3)  | 0.4460 (2) | 0.1770 (3)  | 0.00435 (15)                     |
| <b>Si1</b> | 0.6668 (4)  | 0.0441 (3) | 0.0611 (3)  | 0.0063 (4)                       |
| <b>Si2</b> | 0.5591 (4)  | 0.7860 (3) | -0.3930 (3) | 0.0064 (4)                       |
| <b>Si3</b> | 0.1652 (4)  | 0.4189 (3) | -0.1267 (3) | 0.0066 (4)                       |
| <b>Si4</b> | -0.0031 (4) | 0.2240 (3) | 0.3952 (3)  | 0.0063 (4)                       |
| <b>P1</b>  | 0.6484 (4)  | 0.6666 (3) | -0.0552 (3) | 0.0056 (3)                       |
| <b>P2</b>  | 1.0830 (4)  | 0.0878 (3) | -0.2585 (3) | 0.0055 (3)                       |
| <b>P3</b>  | 0.4757 (4)  | 0.4593 (3) | 0.4869 (3)  | 0.0057 (3)                       |
| <b>P4</b>  | -0.0453 (3) | 0.8470 (3) | 0.2934 (3)  | 0.0059 (3)                       |

**Table S2** Atomic displacement parameters ( $\text{\AA}^2$ ).

|            | $U^{11}$   | $U^{22}$   | $U^{33}$   | $U^{12}$         | $U^{13}$         | $U^{23}$         |
|------------|------------|------------|------------|------------------|------------------|------------------|
| <b>Fe1</b> | 0.0039 (2) | 0.0041 (2) | 0.0039 (2) | -0.00086<br>(17) | -0.00051<br>(17) | -0.00007<br>(16) |
| <b>Si1</b> | 0.0066 (8) | 0.0055 (8) | 0.0060 (8) | -0.0022 (7)      | -0.0014 (7)      | 0.0006 (7)       |
| <b>Si2</b> | 0.0060 (8) | 0.0037 (8) | 0.0067 (9) | 0.0003 (6)       | -0.0011 (7)      | 0.0004 (7)       |
| <b>Si3</b> | 0.0059 (8) | 0.0072 (8) | 0.0069 (9) | -0.0013 (7)      | -0.0031 (7)      | -0.0007 (6)      |
| <b>Si4</b> | 0.0063 (8) | 0.0082 (9) | 0.0045 (8) | -0.0025 (7)      | -0.0016 (7)      | -0.0006 (7)      |
| <b>P1</b>  | 0.0054 (8) | 0.0028 (7) | 0.0069 (8) | -0.0004 (6)      | -0.0014 (6)      | 0.0010 (6)       |
| <b>P2</b>  | 0.0051 (7) | 0.0073 (7) | 0.0037 (7) | -0.0022 (6)      | -0.0009 (6)      | -0.0002 (6)      |
| <b>P3</b>  | 0.0064 (8) | 0.0050 (7) | 0.0035 (7) | -0.0017 (6)      | 0.0005 (6)       | 0.0003 (6)       |
| <b>P4</b>  | 0.0059 (8) | 0.0048 (7) | 0.0060 (8) | -0.0004 (6)      | -0.0021 (7)      | -0.0004 (6)      |

**Table S3** The bond lengths of FeSi<sub>4</sub>P<sub>4</sub> crystal.

|                       |           |                        |           |
|-----------------------|-----------|------------------------|-----------|
| Fe1—Si1               | 2.276 (6) | Si3—P3 <sup>iii</sup>  | 2.321 (6) |
| Fe1—Si3               | 2.282 (6) | Si4—P3 <sup>vi</sup>   | 2.305 (7) |
| Fe1—P4                | 2.301 (6) | Si4—P2 <sup>vii</sup>  | 2.324 (7) |
| Fe1—Si4               | 2.302 (5) | Si4—P4 <sup>i</sup>    | 2.336 (7) |
| Fe1—P3                | 2.302 (6) | P1—Si1 <sup>viii</sup> | 2.318 (7) |
| Fe1—P1                | 2.336 (5) | P1—Si3 <sup>ix</sup>   | 2.321 (7) |
| Si1—P2                | 2.303 (6) | P2—Si2 <sup>ii</sup>   | 2.250 (6) |
| Si1—P1 <sup>i</sup>   | 2.318 (7) | P2—Si3 <sup>ix</sup>   | 2.283 (6) |
| Si1—P4 <sup>ii</sup>  | 2.320 (5) | P2—Si4 <sup>v</sup>    | 2.324 (7) |
| Si2—P3 <sup>iii</sup> | 2.231 (6) | P3—Si2 <sup>x</sup>    | 2.231 (6) |
| Si2—P2 <sup>iv</sup>  | 2.250 (6) | P3—Si4 <sup>ix</sup>   | 2.305 (7) |
| Si2—P4 <sup>v</sup>   | 2.258 (6) | P3—Si3 <sup>x</sup>    | 2.321 (6) |
| Si2—P1                | 2.265 (7) | P4—Si2 <sup>vii</sup>  | 2.258 (6) |
| Si3—P2 <sup>vi</sup>  | 2.283 (6) | P4—Si1 <sup>iv</sup>   | 2.320 (5) |
| Si3—P1 <sup>vi</sup>  | 2.321 (7) | P4—Si4 <sup>viii</sup> | 2.336 (7) |

**Table S4** The bond angles of FeSi<sub>4</sub>P<sub>4</sub> crystal.

| Atoms 1,2,3 | Angle 1,2,3 [°] | Atoms 1,2,3                             | Angle 1,2,3 [°] |
|-------------|-----------------|-----------------------------------------|-----------------|
| Si1—Fe1—Si3 | 87.40 (16)      | P1 <sup>vi</sup> —Si3—P3 <sup>iii</sup> | 109.82 (14)     |
| Si1—Fe1—P4  | 177.76 (11)     | Fe1—Si4—P3 <sup>vi</sup>                | 112.3 (2)       |
| Si3—Fe1—P4  | 91.10 (17)      | Fe1—Si4—P2 <sup>vii</sup>               | 111.74 (18)     |

|             |             |                                           |             |
|-------------|-------------|-------------------------------------------|-------------|
| Si1—Fe1—Si4 | 82.0 (2)    | P3 <sup>vi</sup> —Si4—P2 <sup>vii</sup>   | 109.29 (14) |
| Si3—Fe1—Si4 | 87.7 (2)    | Fe1—Si4—P4 <sup>i</sup>                   | 129.50 (17) |
| P4—Fe1—Si4  | 96.3 (3)    | P3 <sup>vi</sup> —Si4—P4 <sup>i</sup>     | 94.9 (2)    |
| Si1—Fe1—P3  | 91.20 (16)  | P2 <sup>vii</sup> —Si4—P4 <sup>i</sup>    | 96.78 (17)  |
| Si3—Fe1—P3  | 177.99 (10) | Si2—P1—Si1 <sup>viii</sup>                | 99.84 (17)  |
| P4—Fe1—P3   | 90.25 (16)  | Si2—P1—Si3 <sup>ix</sup>                  | 112.46 (14) |
| Si4—Fe1—P3  | 90.7 (2)    | Si1 <sup>viii</sup> —P1—Si3 <sup>ix</sup> | 97.7 (2)    |
| Si1—Fe1—P1  | 97.4 (2)    | Si2—P1—Fe1                                | 111.36 (18) |
| Si3—Fe1—P1  | 90.7 (2)    | Si1 <sup>viii</sup> —P1—Fe1               | 125.24 (18) |
| P4—Fe1—P1   | 84.3 (2)    | Si3 <sup>ix</sup> —P1—Fe1                 | 109.4 (2)   |
| Si4—Fe1—P1  | 178.23 (11) | Si2 <sup>ii</sup> —P2—Si3 <sup>ix</sup>   | 104.2 (2)   |
| P3—Fe1—P1   | 91.0 (2)    | Si2 <sup>ii</sup> —P2—Si1                 | 123.94 (18) |

Symmetry codes: (i)  $x, y-1, z$ ; (ii)  $x+1, y-1, z$ ; (iii)  $x, y, z-1$ ; (iv)  $x-1, y+1, z$ ; (v)  $x+1, y, z-1$ ; (vi)  $x-1, y, z$ ; (vii)  $x-1, y, z+1$ ; (viii)  $x, y+1, z$ ; (ix)  $x+1, y, z$ ; (x)  $x, y, z+1$
